# Supplementary material for: Metabolic Perturbations Associated with an Exposure Mixture of Per- and Polyfluoroalkyl Substances in the Atlanta African American Maternal-Child Cohort
Source: PubMed Central journal article supplement (PMC10620983; doi:10.1021/acs.est.3c04561), 2023-10-19
Supplement: es3c04561_si_001.pdf [file es3c04561_si_001.pdf]

## **Supporting Information**

### **Metabolic Perturbations Associated with an Exposure Mixture of Per- and Polyfluoroalkyl Substances in the Atlanta African American Maternal-Child Cohort**

#### **Authors:**

Donghai Liang<sup>1^</sup>, Kaitlin R. Taibl<sup>1^</sup>, Anne L. Dunlop<sup>2</sup>, Dana Boyd Barr<sup>1</sup>, P. Barry Ryan<sup>1</sup>, Todd Everson<sup>1</sup>, Anke Huels<sup>3,1</sup>, Youran Tan<sup>1</sup>, Parinya Panuwet<sup>1</sup>, Kurunthachalam Kannan<sup>4,5</sup>, Carmen Marsit<sup>1</sup>, Dean P. Jones<sup>6</sup>, Stephanie M. Eick<sup>1</sup>

#### **Affiliations:**

<sup>1</sup>Gangarosa Department of Environmental Health, Rollins School of Public Health, Emory University, Atlanta, GA, 30322, USA

<sup>2</sup>Department of Gynecology and Obstetrics, School of Medicine, Emory University, Atlanta, GA, 30322, USA

<sup>3</sup>Department of Epidemiology, Rollins School of Public Health, Emory University, Atlanta, GA, 30322, USA

<sup>4</sup>Department of Pediatrics, New York University School of Medicine, New York, NY, 10016, USA

<sup>5</sup>Department of Environmental Medicine, New York University School of Medicine, New York, NY, 10016, USA

<sup>6</sup>Division of Pulmonary, Allergy, and Critical Care Medicine, Department of Medicine, School of Medicine, Emory University, Atlanta, GA, 30322, USA

<sup>^</sup> Authors contributed equally

#### **Corresponding Authors:**

Donghai Liang, PhD, MPH

Assistant Professor, Gangarosa Department of Environmental Health

Emory University Rollins School of Public Health

1518 Clifton Rd, Rm 7021

Atlanta, GA 30322, USA

donghai.liang@emory.edu

Stephanie M. Eick, PhD, MPH

Assistant Professor, Gangarosa Department of Environmental Health

Emory University Rollins School of Public Health

1518 Clifton Rd, Rm 7027

Atlanta, GA 30322, USA

stephanie.marie.eick@emory.edu

**Number of Pages:** 8

**Number of Figures:** 3

**Number of Tables:** 2

**Figure S1.** Flowchart of participants included in the analytic sample from the Atlanta African American Maternal-Child Cohort, 2014 – 2020.

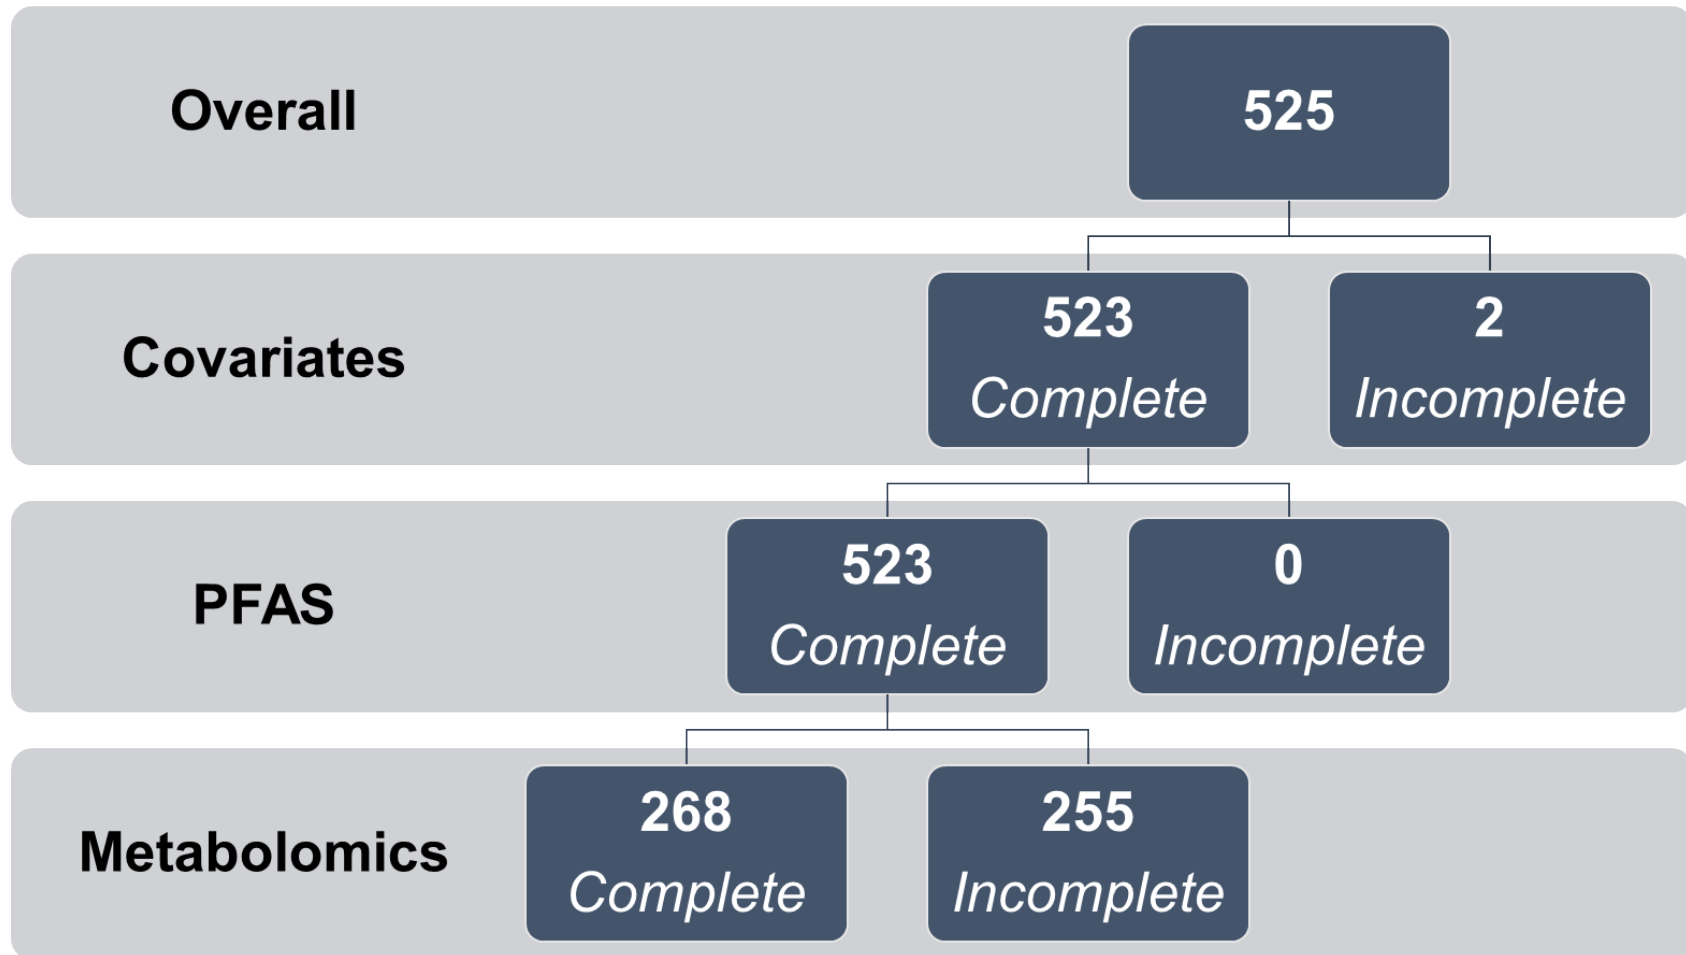

**Figure S2.** Directed acyclic graph (DAG) showing the hypothesized relationships among maternal PFAS exposure, maternal metabolome, and maternal characteristics.

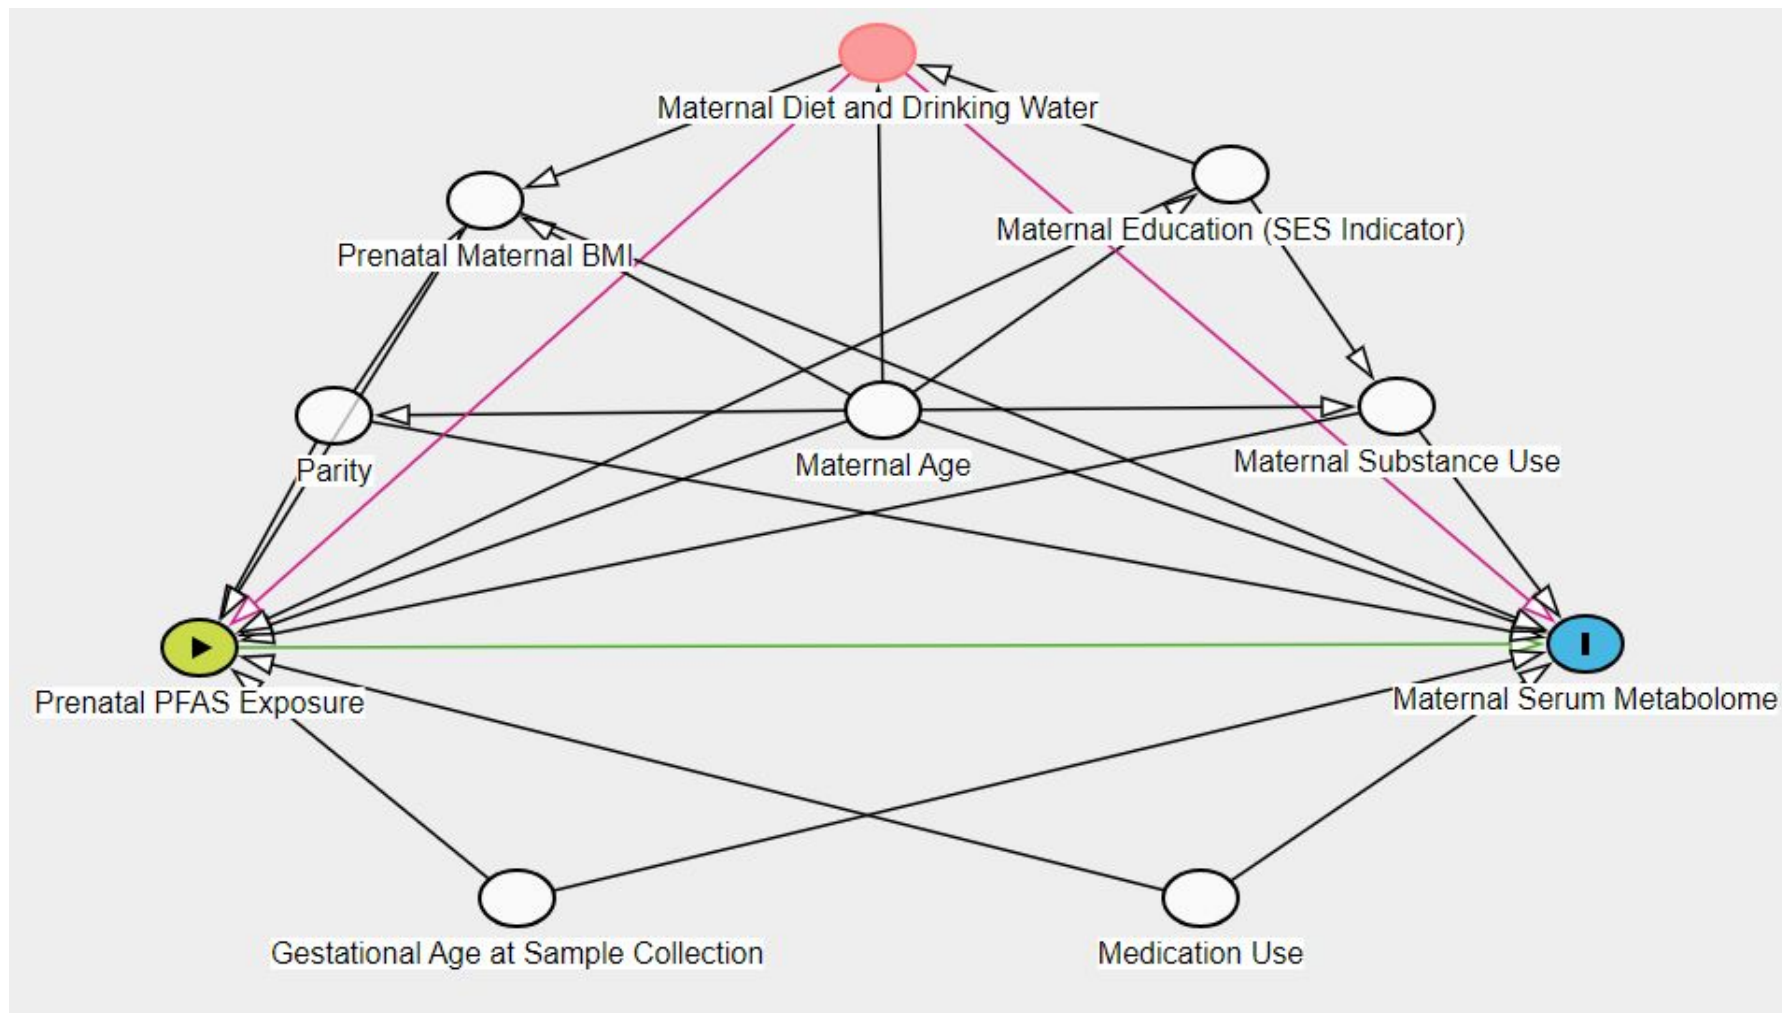

**Figure S3.** Correlation matrix of serum PFAS concentrations in 268 pregnant people in the Atlanta African American Maternal-Child Cohort, 2014 – 2020.

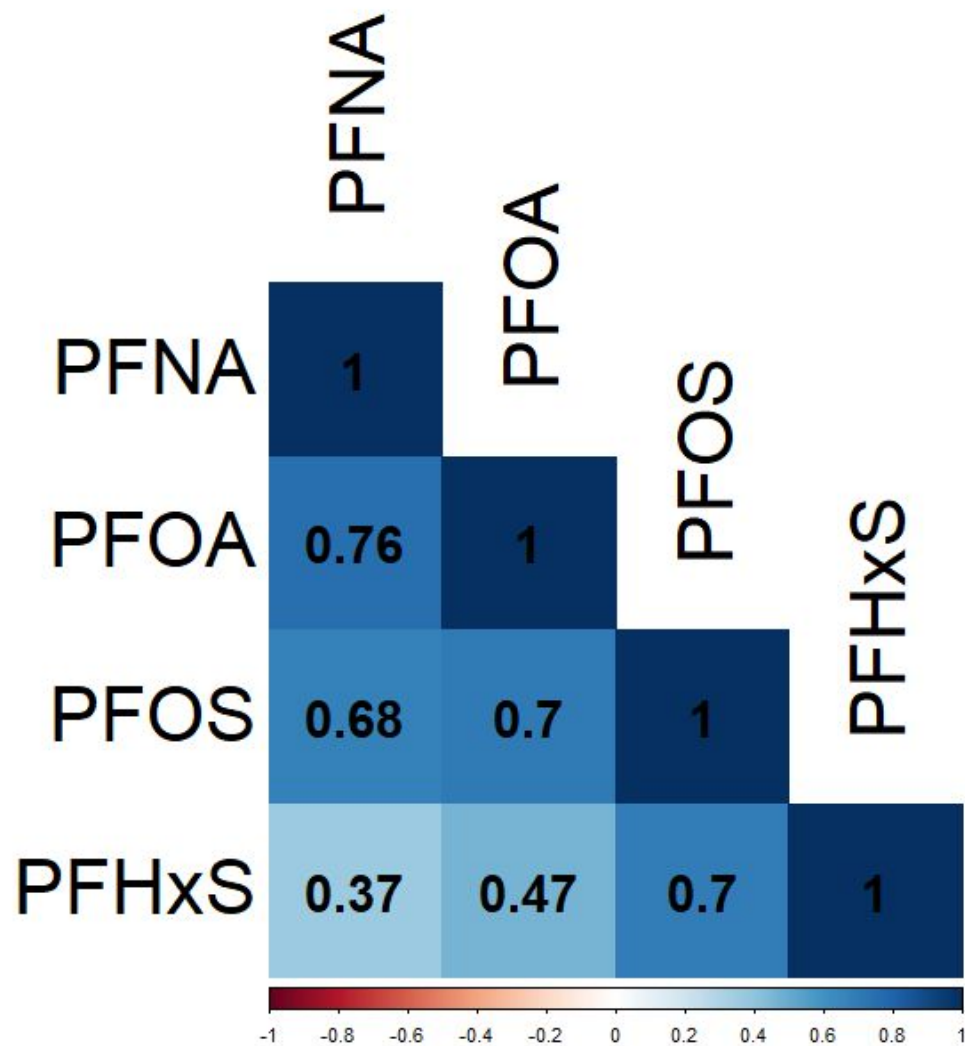

**Table S1.** Metabolic pathways significantly associated with single PFAS chemicals and their exposure mixture in the C18 negative ESI column.

| Pathway                                            | C18 ESI- Column |         |         |           |         |         |           |         |         |           |         |         |                   |         |         |
|----------------------------------------------------|-----------------|---------|---------|-----------|---------|---------|-----------|---------|---------|-----------|---------|---------|-------------------|---------|---------|
|                                                    | PFHxS MWAS      |         |         | PFOS MWAS |         |         | PFOA MWAS |         |         | PFNA MWAS |         |         | PFAS Mixture MWAS |         |         |
|                                                    | Overlap         | Pathway | p-value | Overlap   | Pathway | p-value | Overlap   | Pathway | p-value | Overlap   | Pathway | p-value | Overlap           | Pathway | p-value |
| Alanine and aspartate metabolism                   | -               | -       | -       | -         | -       | -       | -         | -       | -       | -         | -       | -       | -                 | -       | -       |
| Alkaloid biosynthesis II                           | 2               | 6       | 0.033   | -         | -       | -       | -         | -       | -       | -         | -       | -       | -                 | -       | -       |
| Androgen and estrogen biosynthesis and metabolism  | -               | -       | -       | -         | -       | -       | 8         | 67      | 0.047   | -         | -       | -       | -                 | -       | -       |
| Arachidonic acid metabolism                        | -               | -       | -       | -         | -       | -       | -         | -       | -       | -         | -       | -       | -                 | -       | -       |
| Arginine and proline metabolism                    | -               | -       | -       | -         | -       | -       | -         | -       | -       | 9         | 34      | 0.006   | -                 | -       | -       |
| Aspartate and asparagine metabolism                | -               | -       | -       | -         | -       | -       | -         | -       | -       | -         | -       | -       | -                 | -       | -       |
| β-Alanine metabolism                               | -               | -       | -       | -         | -       | -       | -         | -       | -       | -         | -       | -       | -                 | -       | -       |
| Bile acid biosynthesis                             | -               | -       | -       | -         | -       | -       | 6         | 44      | 0.023   | -         | -       | -       | -                 | -       | -       |
| Biopterin metabolism                               | -               | -       | -       | -         | -       | -       | -         | -       | -       | -         | -       | -       | -                 | -       | -       |
| Blood group biosynthesis                           | -               | -       | -       | -         | -       | -       | -         | -       | -       | -         | -       | -       | 2                 | 4       | 0.023   |
| Butyrate metabolism                                | -               | -       | -       | -         | -       | -       | -         | -       | -       | -         | -       | -       | -                 | -       | -       |
| Caffeine metabolism                                | 3               | 11      | 0.020   | -         | -       | -       | -         | -       | -       | -         | -       | -       | -                 | -       | -       |
| Carbon fixation                                    | 3               | 10      | 0.015   | -         | -       | -       | 2         | 10      | 0.043   | -         | -       | -       | -                 | -       | -       |
| Carnitine shuttle                                  | -               | -       | -       | -         | -       | -       | -         | -       | -       | -         | -       | -       | -                 | -       | -       |
| CoA catabolism                                     | -               | -       | -       | -         | -       | -       | -         | -       | -       | -         | -       | -       | -                 | -       | -       |
| De novo fatty acid biosynthesis                    | -               | -       | -       | -         | -       | -       | -         | -       | -       | -         | -       | -       | 14                | 31      | 0.0005  |
| Di-unsaturated fatty acid β-oxidation              | -               | -       | -       | -         | -       | -       | -         | -       | -       | -         | -       | -       | 2                 | 5       | 0.040   |
| Drug metabolism - cytochrome P450                  | 8               | 48      | 0.045   | -         | -       | -       | -         | -       | -       | -         | -       | -       | -                 | -       | -       |
| Drug metabolism - other enzymes                    | -               | -       | -       | -         | -       | -       | 4         | 26      | 0.022   | -         | -       | -       | -                 | -       | -       |
| Dynorphin metabolism                               | 2               | 6       | 0.033   | 3         | 6       | 0.005   | 2         | 6       | 0.011   | -         | -       | -       | -                 | -       | -       |
| Fatty acid activation                              | 4               | 16      | 0.015   | -         | -       | -       | -         | -       | -       | -         | -       | -       | 9                 | 30      | 0.003   |
| Fatty acid metabolism                              | -               | -       | -       | -         | -       | -       | -         | -       | -       | 4         | 13      | 0.014   | 6                 | 17      | 0.003   |
| Fructose and mannose metabolism                    | 5               | 24      | 0.022   | -         | -       | -       | -         | -       | -       | -         | -       | -       | -                 | -       | -       |
| Glutamate metabolism                               | -               | -       | -       | -         | -       | -       | -         | -       | -       | -         | -       | -       | 4                 | 13      | 0.014   |
| Glutathione metabolism                             | -               | -       | -       | -         | -       | -       | -         | -       | -       | -         | -       | -       | -                 | -       | -       |
| Glycerophospholipid metabolism                     | -               | -       | -       | -         | -       | -       | -         | -       | -       | -         | -       | -       | 11                | 46      | 0.013   |
| Glycine, serine, alanine, and threonine metabolism | 8               | 48      | 0.045   | -         | -       | -       | -         | -       | -       | -         | -       | -       | 14                | 47      | 0.001   |
| Glycosphingolipid biosynthesis - ganglioseries     | -               | -       | -       | -         | -       | -       | -         | -       | -       | -         | -       | -       | 4                 | 15      | 0.029   |
| Glycosphingolipid biosynthesis - lactoseries       | -               | -       | -       | -         | -       | -       | -         | -       | -       | -         | -       | -       | 2                 | 4       | 0.023   |
| Glycosphingolipid biosynthesis - neolactoseries    | -               | -       | -       | -         | -       | -       | -         | -       | -       | -         | -       | -       | 2                 | 4       | 0.023   |
| Glycosphingolipid metabolism                       | -               | -       | -       | -         | -       | -       | -         | -       | -       | 6         | 27      | 0.040   | -                 | -       | -       |
| Glyoxylate and dicarboxylate metabolism            | 4               | 9       | 0.003   | -         | -       | -       | -         | -       | -       | -         | -       | -       | 3                 | 8       | 0.013   |
| Histidine metabolism                               | 5               | 24      | 0.022   | -         | -       | -       | -         | -       | -       | 6         | 24      | 0.018   | -                 | -       | -       |
| Hyaluronic acid metabolism                         | -               | -       | -       | -         | -       | -       | -         | -       | -       | -         | -       | -       | 2                 | 4       | 0.023   |
| Keratan sulfate biosynthesis                       | -               | -       | -       | -         | -       | -       | -         | -       | -       | -         | -       | -       | 2                 | 5       | 0.040   |
| Keratan sulfate degradation                        | -               | -       | -       | -         | -       | -       | -         | -       | -       | -         | -       | -       | -                 | -       | -       |
| Leukotriene metabolism                             | 9               | 48      | 0.019   | 9         | 48      | 0.017   | -         | -       | -       | -         | -       | -       | 13                | 50      | 0.005   |
| Linoleic acid metabolism                           | -               | -       | -       | -         | -       | -       | -         | -       | -       | -         | -       | -       | 11                | 22      | 0.0005  |
| Lysine metabolism                                  | 5               | 25      | 0.026   | 5         | 25      | 0.030   | -         | -       | -       | 6         | 25      | 0.024   | 7                 | 28      | 0.017   |
| Methionine and cysteine metabolism                 | -               | -       | -       | -         | -       | -       | -         | -       | -       | -         | -       | -       | -                 | -       | -       |
| N-Glycan degradation                               | -               | -       | -       | -         | -       | -       | -         | -       | -       | -         | -       | -       | -                 | -       | -       |

|                                                           |   |    |       |    |    |       |   |    |       |    |       |       |    |    |       |
|-----------------------------------------------------------|---|----|-------|----|----|-------|---|----|-------|----|-------|-------|----|----|-------|
| O-Glycan biosynthesis                                     | - | -  | -     | -  | -  | -     | - | -  | -     | -  | -     | -     | 2  | 3  | 0.011 |
| Ω-3 fatty acid metabolism                                 | - | -  | -     | -  | -  | -     | - | -  | -     | -  | -     | -     | -  | -  | -     |
| Ω-6 fatty acid metabolism                                 | - | -  | -     | -  | -  | -     | - | -  | -     | -  | -     | -     | 4  | 12 | 0.010 |
| Peroxisomal fatty acid oxidation                          | - | -  | -     | -  | -  | -     | - | -  | -     | -  | -     | -     | -  | -  | -     |
| Phosphatidylinositol phosphate metabolism                 | 6 | 30 | 0.021 | -  | -  | -     | - | -  | -     | -  | -     | -     | -  | -  | -     |
| Phytanic acid peroxisomal oxidation                       | - | -  | -     | -  | -  | -     | - | -  | -     | -  | -     | -     | -  | -  | -     |
| Porphyrin metabolism                                      | 5 | 22 | 0.015 | 6  | 22 | 0.005 | - | -  | -     | -  | -     | -     | -  | -  | -     |
| Propanoate metabolism                                     | - | -  | -     | -  | -  | -     | - | -  | -     | -  | -     | -     | -  | -  | -     |
| Prostaglandin formation from arachidonic acid             | - | -  | -     | 12 | 62 | 0.009 | - | -  | -     | -  | -     | -     | 12 | 56 | 0.035 |
| Prostaglandin formation from dihomo γ-linoleic acid       | - | -  | -     | -  | -  | -     | - | -  | -     | -  | -     | -     | -  | -  | -     |
| Purine metabolism                                         | - | -  | -     | -  | -  | -     | - | -  | -     | -  | -     | -     | -  | -  | -     |
| Putative anti-inflammatory metabolites formation from EPA | - | -  | -     | -  | -  | -     | - | -  | -     | -  | -     | -     | -  | -  | -     |
| Saturated fatty acids β-oxidation                         | - | -  | -     | -  | -  | -     | - | -  | -     | -  | -     | -     | -  | -  | -     |
| Selenoamino acid metabolism                               | - | -  | -     | -  | -  | -     | - | -  | -     | -  | -     | -     | 5  | 22 | 0.048 |
| Sphingolipid metabolism                                   | - | -  | -     | -  | -  | -     | - | -  | -     | -  | -     | -     | -  | -  | -     |
| Starch and sucrose metabolism                             | - | -  | -     | -  | -  | -     | - | -  | -     | -  | -     | -     | -  | -  | -     |
| TCA cycle                                                 | - | -  | -     | -  | -  | -     | - | -  | -     | -  | -     | -     | 5  | 18 | 0.015 |
| Tryptophan metabolism                                     | - | -  | -     | -  | -  | -     | - | -  | 14    | 63 | 0.013 | -     | -  | -  | -     |
| Tyrosine metabolism                                       | - | -  | -     | 16 | 94 | 0.018 | - | -  | 22    | 94 | 0.004 | -     | -  | -  | -     |
| Ubiquinone biosynthesis                                   | - | -  | -     | -  | -  | -     | - | -  | -     | -  | -     | -     | -  | -  | -     |
| Urea cycle/amino group metabolism                         | - | -  | -     | -  | -  | -     | 6 | 47 | 0.036 | 11 | 47    | 0.011 | -  | -  | -     |
| Valine, leucine, and isoleucine degradation               | - | -  | -     | 5  | 26 | 0.036 | - | -  | -     | -  | -     | -     | 9  | 31 | 0.004 |
| Vitamin A metabolism                                      | - | -  | -     | -  | -  | -     | - | -  | -     | -  | -     | -     | -  | -  | -     |
| Vitamin B1 metabolism                                     | - | -  | -     | -  | -  | -     | 2 | 10 | 0.043 | -  | -     | -     | -  | -  | -     |
| Vitamin B2 metabolism                                     | - | -  | -     | -  | -  | -     | - | -  | -     | -  | -     | -     | -  | -  | -     |
| Vitamin B3 metabolism                                     | - | -  | -     | -  | -  | -     | - | -  | -     | -  | -     | -     | -  | -  | -     |
| Vitamin B5 biosynthesis                                   | - | -  | -     | -  | -  | -     | - | -  | -     | -  | -     | -     | -  | -  | -     |
| Vitamin B6 metabolism                                     | - | -  | -     | 3  | 8  | 0.010 | - | -  | -     | 4  | 8     | 0.002 | -  | -  | -     |
| Vitamin C metabolism                                      | - | -  | -     | -  | -  | -     | - | -  | -     | 5  | 21    | 0.035 | 5  | 22 | 0.048 |
| Vitamin D3 metabolism                                     | - | -  | -     | -  | -  | -     | 2 | 8  | 0.023 | -  | -     | -     | 3  | 11 | 0.045 |
| Vitamin E metabolism                                      | 7 | 30 | 0.008 | -  | -  | -     | 4 | 30 | 0.045 | -  | -     | -     | 8  | 33 | 0.018 |
| Vitamin H metabolism                                      | - | -  | -     | -  | -  | -     | - | -  | -     | -  | -     | -     | -  | -  | -     |
| Vitamin K metabolism                                      | - | -  | -     | -  | -  | -     | - | -  | -     | -  | -     | -     | 2  | 3  | 0.011 |

Note: Overlap size is the number of metabolic features enriched in the pathway. Pathway size is the total number of metabolic features. Only the following adducts were considered: M-H<sup>[-]</sup>, M + Cl<sup>[-]</sup>, M + ACN-H<sup>[-]</sup>, M + HCOO<sup>[-]</sup>, M(C13)-H<sup>[-]</sup>, M-H<sub>2</sub>O-H<sup>[-]</sup>, and M + Na-2H<sup>[-]</sup>.

**Table S2.** Metabolic pathways significantly associated with single PFAS chemicals and their exposure mixture in the HILIC positive ESI column.

| Pathway                                            | HILIC ESI+ Column |         |         |           |         |         |           |         |         |           |         |         |                   |         |         |
|----------------------------------------------------|-------------------|---------|---------|-----------|---------|---------|-----------|---------|---------|-----------|---------|---------|-------------------|---------|---------|
|                                                    | PFHxS MWAS        |         |         | PFOS MWAS |         |         | PFOA MWAS |         |         | PFNA MWAS |         |         | PFAS Mixture MWAS |         |         |
|                                                    | Overlap           | Pathway | p-value | Overlap   | Pathway | p-value | Overlap   | Pathway | p-value | Overlap   | Pathway | p-value | Overlap           | Pathway | p-value |
| Alanine and aspartate metabolism                   | -                 | -       | -       | -         | -       | -       | -         | -       | -       | -         | -       | -       | 5                 | 23      | 0.019   |
| Alkaloid biosynthesis II                           | -                 | -       | -       | 2         | 6       | 0.026   | -         | -       | -       | -         | -       | -       | 2                 | 6       | 0.037   |
| Androgen and estrogen biosynthesis and metabolism  | -                 | -       | -       | -         | -       | -       | -         | -       | -       | -         | -       | -       | -                 | -       | -       |
| Arachidonic acid metabolism                        | -                 | -       | -       | 14        | 71      | 0.047   | -         | -       | -       | -         | -       | -       | -                 | -       | -       |
| Arginine and proline metabolism                    | -                 | -       | -       | -         | -       | -       | -         | -       | -       | -         | -       | -       | 11                | 34      | 0.001   |
| Aspartate and asparagine metabolism                | -                 | -       | -       | -         | -       | -       | -         | -       | -       | 15        | 66      | 0.008   | 14                | 58      | 0.002   |
| β-Alanine metabolism                               | -                 | -       | -       | -         | -       | -       | -         | -       | -       | -         | -       | -       | 4                 | 14      | 0.009   |
| Bile acid biosynthesis                             | -                 | -       | -       | -         | -       | -       | -         | -       | -       | -         | -       | -       | -                 | -       | -       |
| Biopterin metabolism                               | -                 | -       | -       | -         | -       | -       | -         | -       | -       | 5         | 17      | 0.012   | 5                 | 18      | 0.006   |
| Blood group biosynthesis                           | -                 | -       | -       | -         | -       | -       | -         | -       | -       | -         | -       | -       | -                 | -       | -       |
| Butyrate metabolism                                | -                 | -       | -       | 7         | 26      | 0.005   | -         | -       | -       | 6         | 26      | 0.034   | -                 | -       | -       |
| Caffeine metabolism                                | -                 | -       | -       | -         | -       | -       | -         | -       | -       | -         | -       | -       | 3                 | 11      | 0.021   |
| Carbon fixation                                    | 4                 | 9       | 0.004   | -         | -       | -       | -         | -       | -       | -         | -       | -       | 3                 | 10      | 0.015   |
| Carnitine shuttle                                  | -                 | -       | -       | -         | -       | -       | 7         | 36      | 0.039   | 8         | 36      | 0.028   | -                 | -       | -       |
| CoA catabolism                                     | -                 | -       | -       | -         | -       | -       | -         | -       | -       | 2         | 4       | 0.037   | -                 | -       | -       |
| De novo fatty acid biosynthesis                    | 13                | 31      | 0.001   | 12        | 31      | 0.0002  | 11        | 31      | 0.001   | 9         | 31      | 0.003   | -                 | -       | -       |
| Di-unsaturated fatty acid β-oxidation              | -                 | -       | -       | 3         | 5       | 0.001   | -         | -       | -       | -         | -       | -       | -                 | -       | -       |
| Drug metabolism - cytochrome P450                  | -                 | -       | -       | -         | -       | -       | -         | -       | -       | -         | -       | -       | -                 | -       | -       |
| Drug metabolism - other enzymes                    | -                 | -       | -       | -         | -       | -       | -         | -       | -       | -         | -       | -       | 5                 | 26      | 0.034   |
| Dynorphin metabolism                               | -                 | -       | -       | -         | -       | -       | -         | -       | -       | -         | -       | -       | 2                 | 6       | 0.037   |
| Fatty acid activation                              | 9                 | 30      | 0.004   | 9         | 30      | 0.001   | 7         | 30      | 0.011   | -         | -       | -       | -                 | -       | -       |
| Fatty acid metabolism                              | 5                 | 17      | 0.015   | 6         | 17      | 0.001   | 6         | 17      | 0.002   | 6         | 17      | 0.003   | -                 | -       | -       |
| Fructose and mannose metabolism                    | -                 | -       | -       | -         | -       | -       | -         | -       | -       | -         | -       | -       | -                 | -       | -       |
| Glutamate metabolism                               | -                 | -       | -       | 4         | 13      | 0.006   | -         | -       | -       | 4         | 13      | 0.017   | 3                 | 13      | 0.037   |
| Glutathione metabolism                             | -                 | -       | -       | 3         | 10      | 0.013   | -         | -       | -       | -         | -       | -       | -                 | -       | -       |
| Glycerophospholipid metabolism                     | 10                | 46      | 0.036   | -         | -       | -       | -         | -       | -       | -         | -       | -       | -                 | -       | -       |
| Glycine, serine, alanine, and threonine metabolism | -                 | -       | -       | 13        | 47      | 0.001   | 11        | 47      | 0.004   | 12        | 47      | 0.004   | 9                 | 48      | 0.020   |
| Glycosphingolipid biosynthesis - ganglioseries     | -                 | -       | -       | -         | -       | -       | -         | -       | -       | -         | -       | -       | -                 | -       | -       |
| Glycosphingolipid biosynthesis - lactoseries       | -                 | -       | -       | -         | -       | -       | -         | -       | -       | -         | -       | -       | -                 | -       | -       |
| Glycosphingolipid biosynthesis - neolactoseries    | -                 | -       | -       | -         | -       | -       | -         | -       | -       | -         | -       | -       | -                 | -       | -       |
| Glycosphingolipid metabolism                       | -                 | -       | -       | -         | -       | -       | -         | -       | -       | -         | -       | -       | -                 | -       | -       |
| Glyoxylate and dicarboxylate metabolism            | -                 | -       | -       | -         | -       | -       | -         | -       | -       | -         | -       | -       | 4                 | 9       | 0.002   |
| Histidine metabolism                               | -                 | -       | -       | -         | -       | -       | 6         | 23      | 0.008   | 7         | 23      | 0.004   | -                 | -       | -       |
| Hyaluronic acid metabolism                         | -                 | -       | -       | 2         | 4       | 0.009   | -         | -       | -       | -         | -       | -       | 2                 | 5       | 0.024   |
| Keratan sulfate biosynthesis                       | -                 | -       | -       | -         | -       | -       | -         | -       | -       | -         | -       | -       | -                 | -       | -       |
| Keratan sulfate degradation                        | -                 | -       | -       | 3         | 8       | 0.005   | -         | -       | -       | -         | -       | -       | -                 | -       | -       |
| Leukotriene metabolism                             | 12                | 50      | 0.011   | 14        | 50      | 0.001   | 12        | 50      | 0.003   | 11        | 50      | 0.019   | -                 | -       | -       |
| Linoleic acid metabolism                           | 9                 | 22      | 0.001   | 14        | 22      | 0.0001  | -         | -       | -       | 6         | 22      | 0.012   | 4                 | 21      | 0.048   |
| Lysine metabolism                                  | -                 | -       | -       | 7         | 28      | 0.009   | 7         | 28      | 0.007   | 9         | 28      | 0.002   | 11                | 25      | 0.001   |
| Methionine and cysteine metabolism                 | -                 | -       | -       | 14        | 53      | 0.002   | -         | -       | -       | -         | -       | -       | -                 | -       | -       |
| N-Glycan degradation                               | -                 | -       | -       | 2         | 7       | 0.039   | -         | -       | -       | -         | -       | -       | -                 | -       | -       |

|                                                           |    |    |       |    |    |       |   |    |       |   |    |       |    |       |   |
|-----------------------------------------------------------|----|----|-------|----|----|-------|---|----|-------|---|----|-------|----|-------|---|
| O-Glycan biosynthesis                                     | -  | -  | -     | -  | -  | -     | - | -  | -     | - | -  | -     | -  | -     | - |
| Ω-3 fatty acid metabolism                                 | 5  | 13 | 0.004 | 4  | 13 | 0.006 | - | -  | -     | - | -  | -     | -  | -     | - |
| Ω-6 fatty acid metabolism                                 | -  | -  | -     | 4  | 12 | 0.004 | 5 | 12 | 0.002 | - | -  | -     | -  | -     | - |
| Peroxisomal fatty acid oxidation                          | -  | -  | -     | -  | -  | -     | - | -  | -     | - | -  | 2     | 2  | 0.005 | - |
| Phosphatidylinositol phosphate metabolism                 | 7  | 28 | 0.020 | -  | -  | -     | - | -  | -     | - | -  | -     | -  | -     | - |
| Phytanic acid peroxisomal oxidation                       | -  | -  | -     | 4  | 17 | 0.024 | - | -  | -     | - | -  | -     | -  | -     | - |
| Porphyrin metabolism                                      | -  | -  | -     | -  | -  | -     | - | -  | -     | - | -  | 6     | 22 | 0.004 | - |
| Propanoate metabolism                                     | -  | -  | -     | 3  | 12 | 0.028 | - | -  | -     | - | -  | -     | -  | -     | - |
| Prostaglandin formation from arachidonic acid             | -  | -  | -     | -  | -  | -     | - | -  | -     | - | -  | -     | -  | -     | - |
| Prostaglandin formation from dihomo γ-linoleic acid       | -  | -  | -     | 2  | 5  | 0.016 | - | -  | -     | - | -  | -     | -  | -     | - |
| Purine metabolism                                         | 14 | 58 | 0.008 | 12 | 58 | 0.030 | - | -  | -     | - | -  | -     | -  | -     | - |
| Putative anti-inflammatory metabolites formation from EPA | -  | -  | -     | 7  | 21 | 0.001 | - | -  | -     | - | -  | -     | -  | -     | - |
| Saturated fatty acids β-oxidation                         | -  | -  | -     | 5  | 17 | 0.005 | - | -  | -     | - | -  | -     | -  | -     | - |
| Selenoamino acid metabolism                               | -  | -  | -     | 6  | 22 | 0.006 | - | -  | -     | - | -  | 4     | 21 | 0.048 | - |
| Sphingolipid metabolism                                   | -  | -  | -     | -  | -  | -     | 2 | 2  | 0.007 | - | -  | -     | -  | -     | - |
| Starch and sucrose metabolism                             | -  | -  | -     | 5  | 19 | 0.010 | - | -  | -     | - | -  | -     | -  | -     | - |
| TCA cycle                                                 | -  | -  | -     | 4  | 18 | 0.032 | - | -  | -     | - | -  | 5     | 21 | 0.012 | - |
| Tryptophan metabolism                                     | -  | -  | -     | -  | -  | -     | - | -  | -     | - | -  | -     | -  | -     | - |
| Tyrosine metabolism                                       | -  | -  | -     | -  | -  | -     | - | -  | -     | - | -  | 22    | 94 | 0.001 | - |
| Ubiquinone biosynthesis                                   | -  | -  | -     | 2  | 7  | 0.039 | - | -  | -     | - | -  | -     | -  | -     | - |
| Urea cycle/amino group metabolism                         | -  | -  | -     | -  | -  | -     | - | -  | -     | - | -  | 13    | 47 | 0.001 | - |
| Valine, leucine, and isoleucine degradation               | -  | -  | -     | 7  | 31 | 0.018 | - | -  | -     | 7 | 31 | 0.031 | -  | -     | - |
| Vitamin A metabolism                                      | 9  | 38 | 0.020 | 11 | 38 | 0.001 | - | -  | -     | - | -  | -     | -  | -     | - |
| Vitamin B1 metabolism                                     | -  | -  | -     | -  | -  | -     | - | -  | -     | - | -  | -     | -  | -     | - |
| Vitamin B2 metabolism                                     | -  | -  | -     | 2  | 4  | 0.009 | 2 | 4  | 0.030 | - | -  | -     | -  | -     | - |
| Vitamin B3 metabolism                                     | 8  | 23 | 0.002 | 5  | 23 | 0.030 | - | -  | -     | - | -  | -     | -  | -     | - |
| Vitamin B5 biosynthesis                                   | -  | -  | -     | -  | -  | -     | - | -  | -     | 3 | 10 | 0.042 | -  | -     | - |
| Vitamin B6 metabolism                                     | -  | -  | -     | -  | -  | -     | - | -  | -     | - | -  | 3     | 8  | 0.008 | - |
| Vitamin C metabolism                                      | -  | -  | -     | 5  | 22 | 0.023 | - | -  | -     | - | -  | 6     | 21 | 0.004 | - |
| Vitamin D3 metabolism                                     | -  | -  | -     | -  | -  | -     | 3 | 11 | 0.042 | - | -  | -     | -  | -     | - |
| Vitamin E metabolism                                      | 8  | 33 | 0.020 | 9  | 33 | 0.003 | 7 | 33 | 0.021 | - | -  | 6     | 30 | 0.022 | - |
| Vitamin H metabolism                                      | 2  | 4  | 0.042 | 2  | 4  | 0.009 | 2 | 4  | 0.030 | 2 | 4  | 0.037 | -  | -     | - |
| Vitamin K metabolism                                      | 2  | 3  | 0.021 | -  | -  | -     | - | -  | -     | - | -  | -     | -  | -     | - |

Note: Overlap size is the number of metabolic features enriched in the pathway. Pathway size is the total number of metabolic features. Only the following adducts were considered: M<sup>[1+]</sup>, M + H<sup>[1+]</sup>, M-H<sub>2</sub>O + H<sup>[1+]</sup>, M + Na<sup>[1+]</sup>, M + K<sup>[1+]</sup>, M+2H<sup>[2+]</sup>, and M(C13)+ 2H<sup>[2+]</sup>.
